# Supplementary material for: Non-Invasive Longitudinal Bioluminescence Imaging of Human Mesoangioblasts in Bioengineered Esophagi
Source: PubMed Central journal article supplement (PMC6389770; doi:10.1089/ten.tec.2018.0351), 2019-02-14
Supplement: Supp_Fig1.pdf [file Supp_Fig1.pdf]

## Supplementary Data

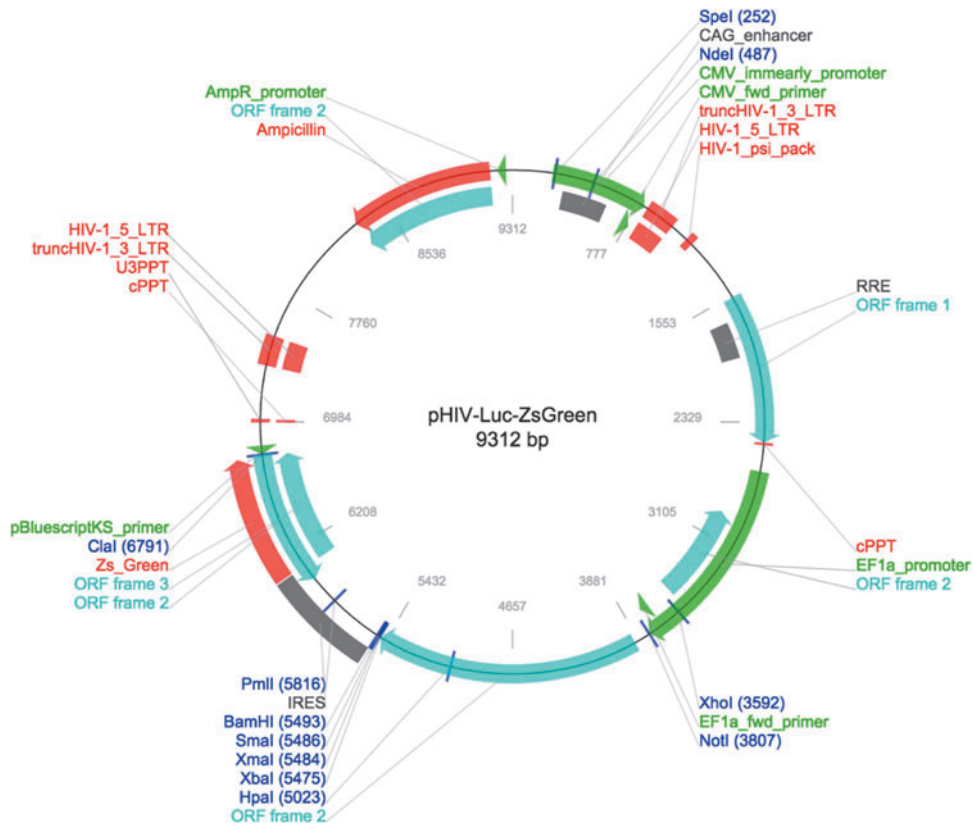

**SUPPLEMENTARY FIG. S1.** The lentiviral transfer vector pHIV-LUC-ZsGreen. The lentivirus coding for ZsGreen fluorescent protein and firefly luciferase separated by an IRES enables the two proteins to be translated from a single mRNA initiated by EF1-alpha promoter. IRES, internal ribosome entry site.
